# Supplementary material for: Tropism of Extracellular Vesicles and Cell-Derived Nanovesicles to Normal and Cancer Cells: New Perspectives in Tumor-Targeted Nucleic Acid Delivery
Source: MDPI journal article supplement (doi:10.3390/pharmaceutics13111911), 2021-11-11
Supplement: s1 [file s1]

# Supplementary Materials: Tropism of Extracellular Vesicles and Cell-Derived Nanovesicles to Normal and Cancer Cells: New Perspectives in Tumor-Targeted Nucleic Acid Delivery

Anastasiya Oshchepkova, Oleg Markov, Evgeniy Evtushenko, Alexander Chernonosov, Elena Kiseleva, Ksenia Morozova, Vera Matveeva, Lyudmila Artemyeva, Valentin Vlassov and Marina Zenkova \*

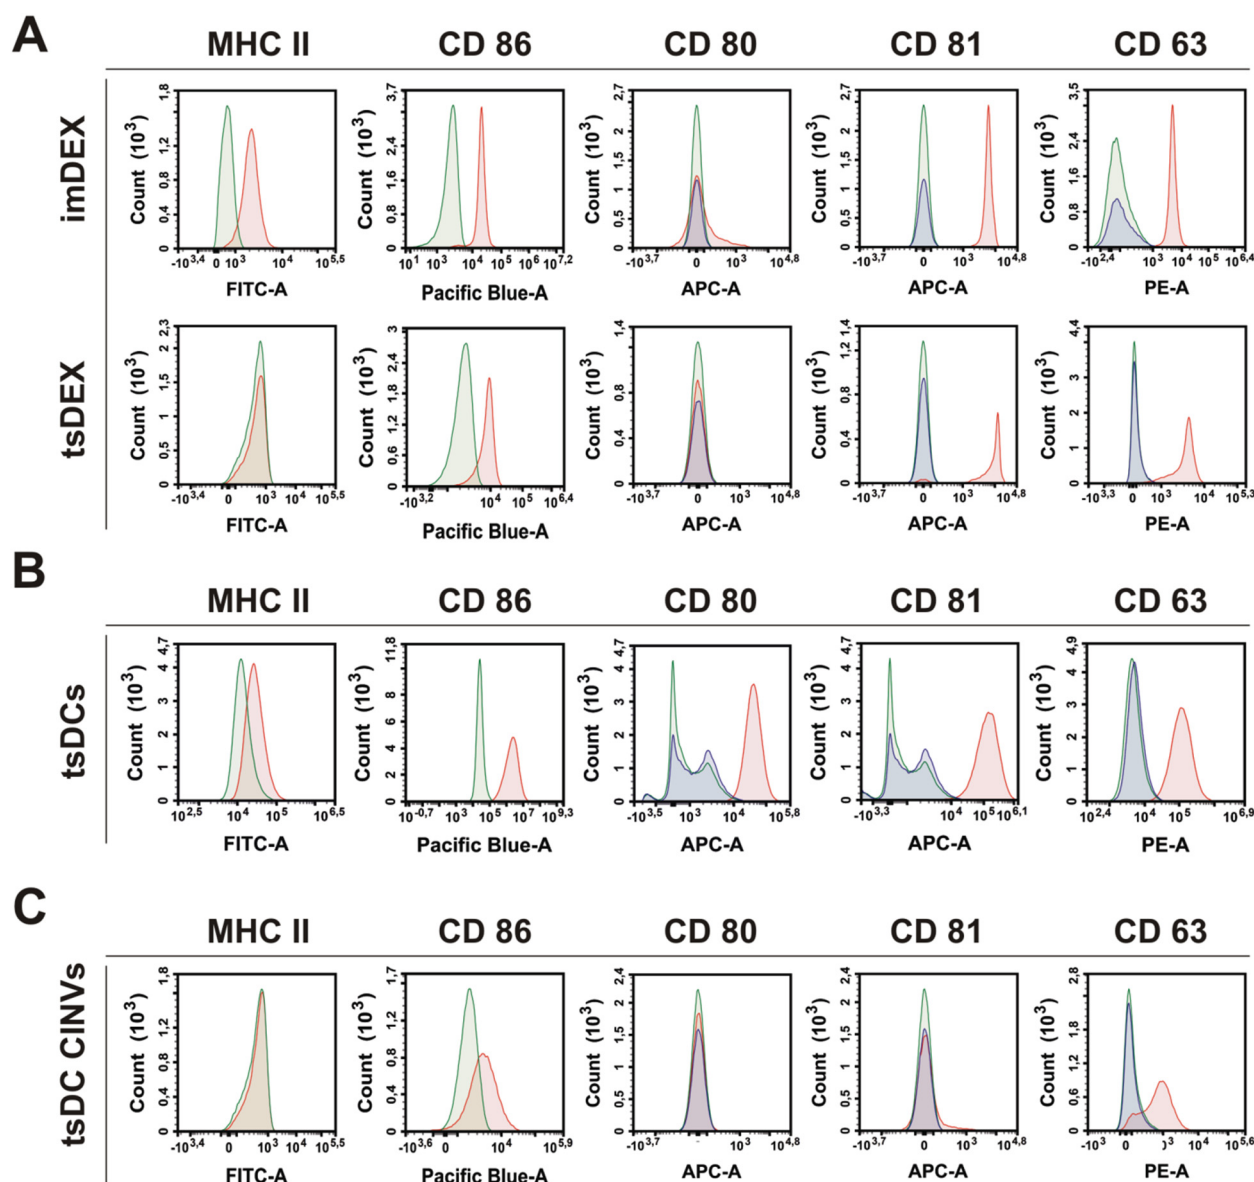

**Figure S1.** Phenotypes of DC-derived EVs (A), tsDCs (B) and CINVs (C). The EVs derived from bone marrow-derived DCs are indicated as imDEX; the EVs derived from tsDCs are indicated as tsDEX; the CINVs derived from tsDCs are indicated as tsDC CINVs. To analyze the surface proteins of EVs or CINVs, nanovesicles were immobilized on aldehyde/sulfate latex beads and stained with specific antibodies or isotype controls. Green color indicates control unstained latex beads or cells, blue color – staining with corresponding isotype control and red color – staining with protein-specific antibodies.

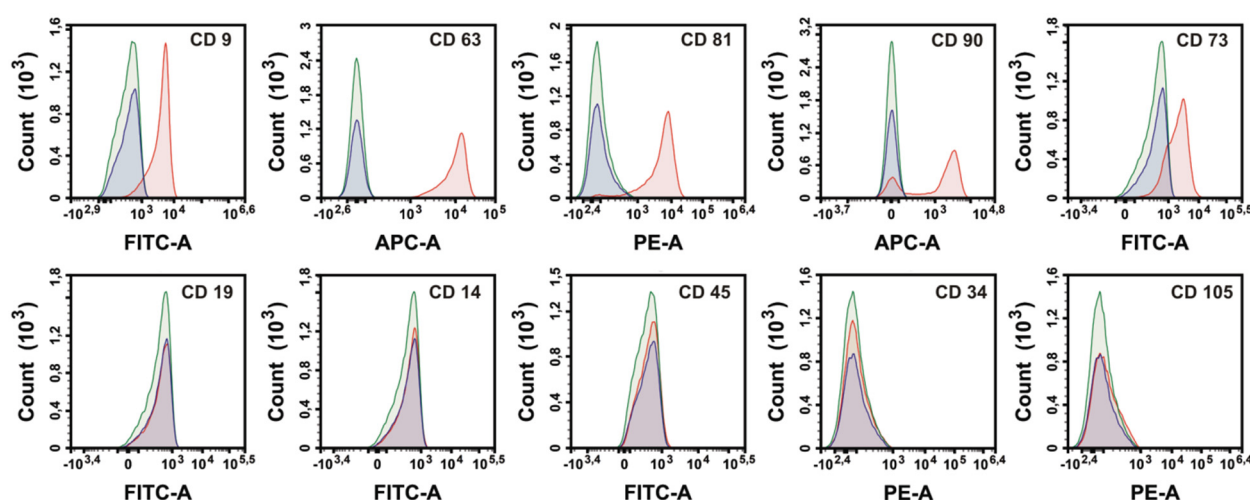

**Figure S2. Phenotype of MSC CINVs.** CINVs were immobilized on aldehyde/sulfate latex beads and stained with specific antibodies or isotype control. Green color indicates unstained latex beads, blue color – staining with corresponding isotype control and red color – staining with protein-specific antibodies.

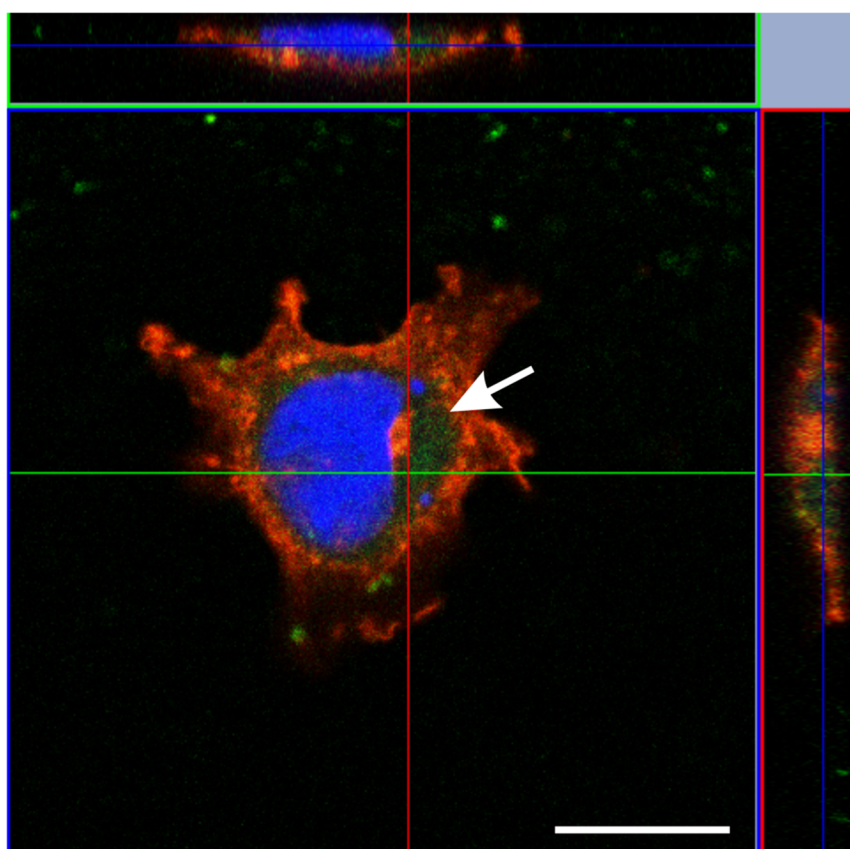

**Figure S3. Accumulation of fluorescein-labelled single-stranded DNA-oligonucleotide (FAM-ON) in HEK 293 cells mediated by MSC CINVs.** Confocal microscopy, Z-stack image. Intracellular accumulation of FAM-ON is indicated by white arrow. Nuclei are indicated by blue color, actin filaments – by red color. The CINVs loaded with FAM-ON were indicated as green signal. Scale bar = 20  $\mu$ m.

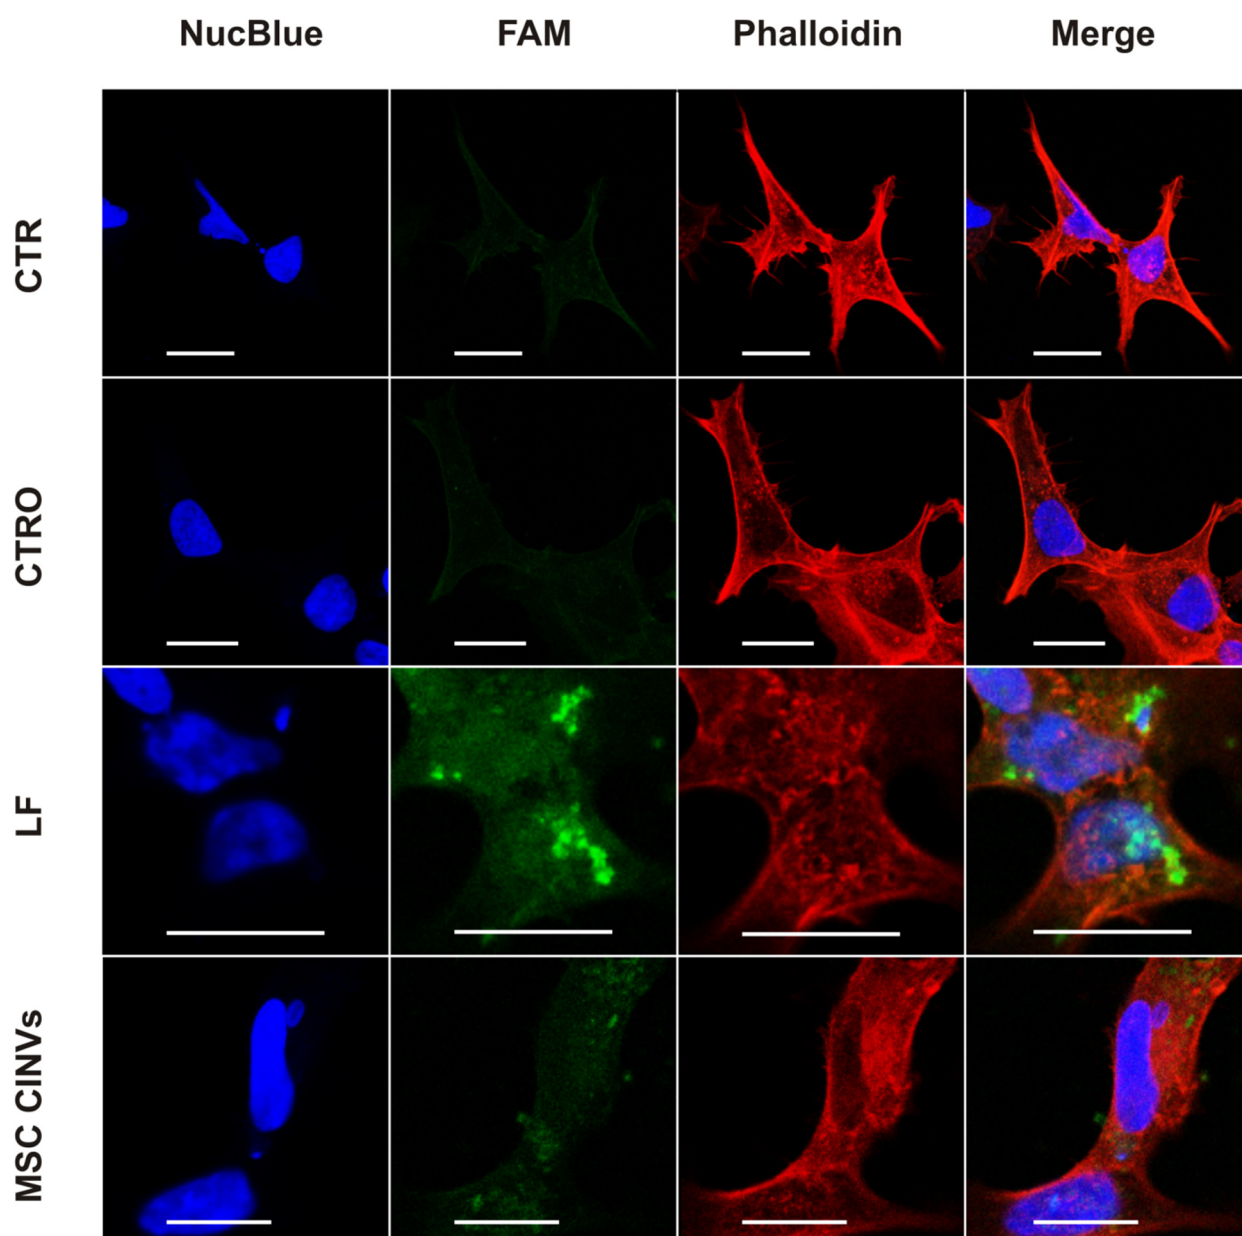

**Figure S4.** Confocal microscopy analysis of FAM-ON delivery into HEK 293 cells mediated by MSC CINVs. Control untreated cells are indicated as CTR. The level of FAM-ON self-penetration is indicated as CTRO. The FAM-ON delivery mediated by Lipofectamine 2000 is indicated as LF. All images in one channel were made in identical settings. Scale bar = 20  $\mu$ m.

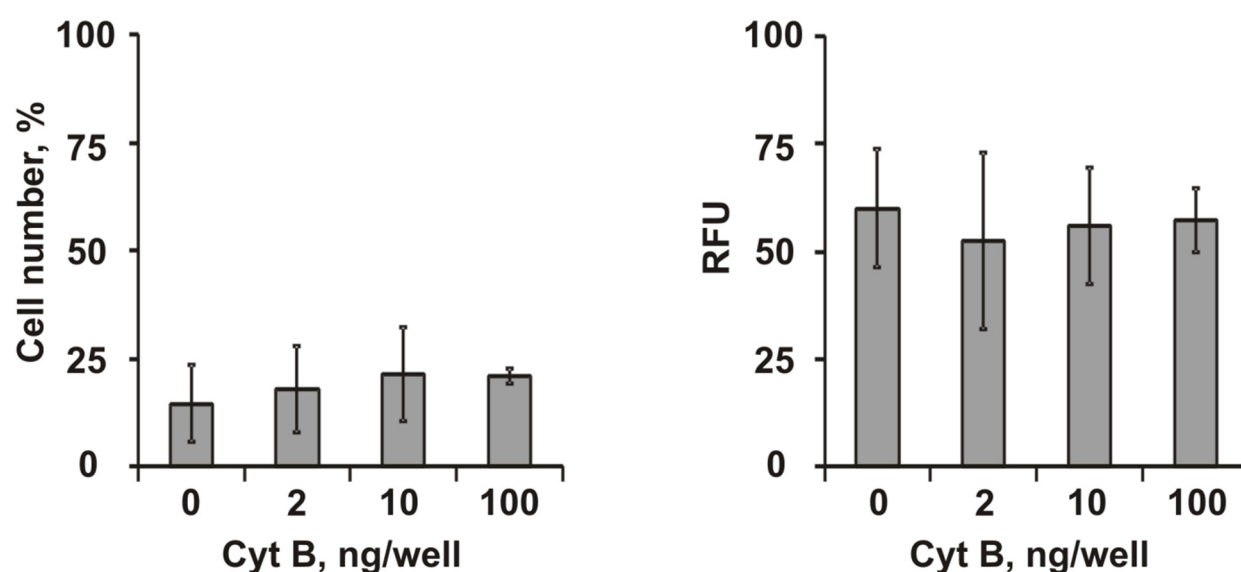

**Figure S5.** FAM-ON uptake by KB-3-1 cells in the presence of various amounts of Cyt B. KB-3-1 cells ( $10^5$  cells/well) were incubated with 1 nmol FAM-ON in the absence (0 ng) or presence of (2, 10 or 100 ng) Cyt B in DMEM supplemented with 10% EV-depleted FBS ( $V = 250 \mu\text{l}$ ) for 4 h. Data are presented as the mean  $\pm$  SD. Cell number is the percentage of FAM-positive cells in a population. RFU – relative fluorescence units detected in a cell population. Experiments with 2 ng, 10 ng or 100 ng Cyt B were twice independently repeated. Experiments without Cyt B (0 ng) were carried out 6 times.

**Table S1.** Treatment of CINV loaded with FAM-ON with mung bean nuclease.

| CINVs | CTR            |                |   | CINVs | Mung bean nuclease |                |   |
|-------|----------------|----------------|---|-------|--------------------|----------------|---|
|       | %              | RFU            | n |       | %                  | RFU            | n |
| MSC   | 95.1 $\pm$ 0.6 | 39.8 $\pm$ 2.7 | 3 | MSC   | 95.5 $\pm$ 1.6     | 34.5 $\pm$ 5.4 | 3 |
| HEK   | 93.7 $\pm$ 1.3 | 10.5 $\pm$ 0.9 | 3 | HEK   | 94.3 $\pm$ 1.5     | 10.4 $\pm$ 1.5 | 3 |

To confirm the internal localization of FAM-ON, loaded into CINV, the samples were treated with mung bean nuclease (see Materials and Methods). In parallel control untreated samples (CTR) were analyzed. To detect the level of FAM-signal in CINV, nanovesicles were immobilized on aldehyde/sulfate latex beads and analyzed by flow cytometry. Data are presented as the mean  $\pm$  SD. The percent (%) indicates FAM-positive latex beads, containing CINV loaded with FAM-ON. RFU – relative fluorescence units. In each condition three samples (n) were analyzed.
